# Supplementary material for: Ag2O mediated N-demethylation and oxidative opening of indenopyrido[2,1-a]isoindolones. Efficient access to polysubstituted 1-azafluorenones
Source: Royal Society of Chemistry journal article supplement (doi:10.1039/c3ra43278e), 2013-01-01

## SUPPORTING INFORMATION

### **Ag<sub>2</sub>O Mediated N-demethylation and oxidative opening of indenopyrido[2,1-a]isoindolones. Efficient access to polysubstituted 1-azafluorenones**

*Victor Mamane\*<sup>a</sup>, Zein Chamas,<sup>a</sup> Emmanuel Aubert<sup>b</sup> and Yves Fort<sup>a</sup>*

<sup>a</sup> *Laboratoire SRSMC UMR CNRS 7565, Université de Lorraine, 54506 Vandoeuvre-les-Nancy, France.* <sup>b</sup> *Laboratoire CRM2 UMR CNRS 7036, Université de Lorraine, 54506 Vandoeuvre-les-Nancy, France.*

*E-mail: victor.mamane@univ-lorraine.fr*

#### **Content**

- Copy of <sup>1</sup>H and <sup>13</sup>C NMR spectra of all compounds

### 2-(9-Oxo-9H-indeno[2,1-b]pyridin-2-yl)-benzoic acid methyl ester (3a)

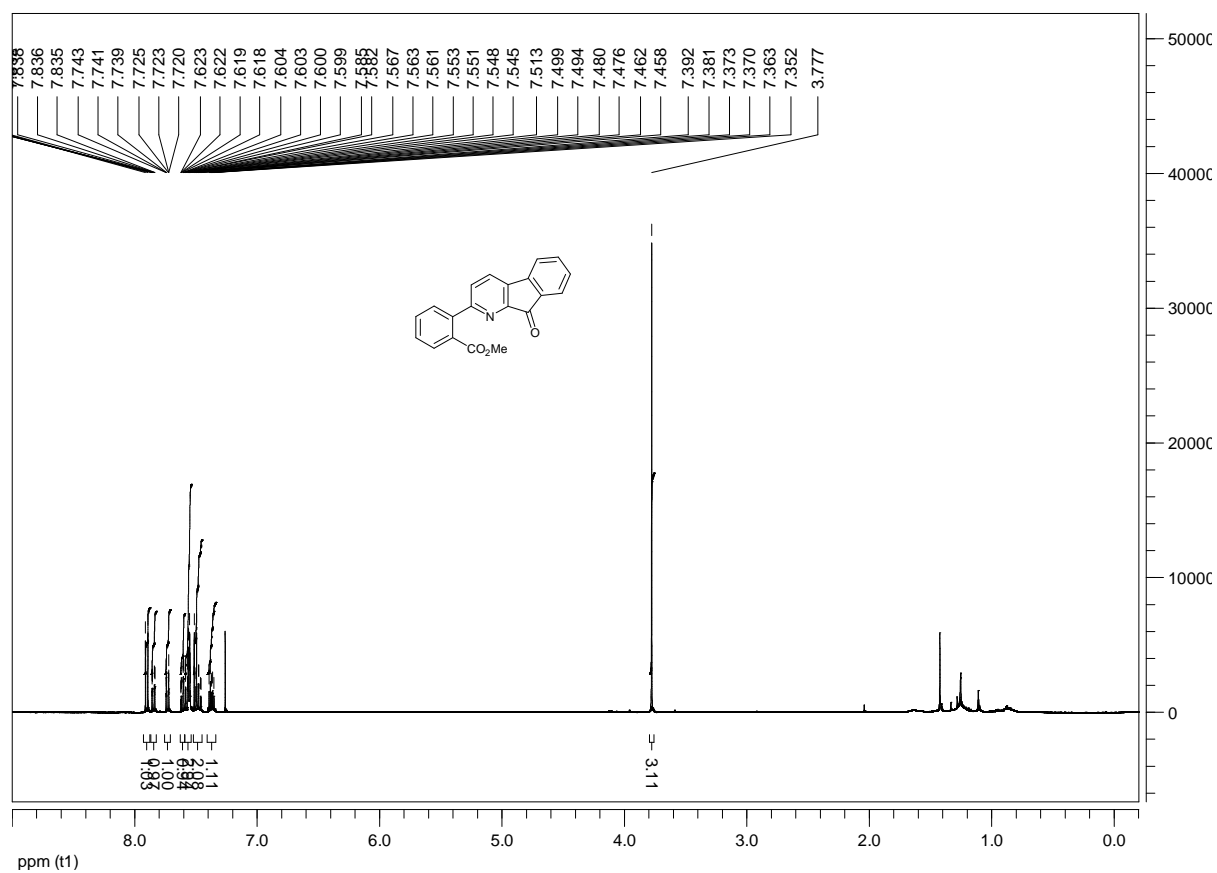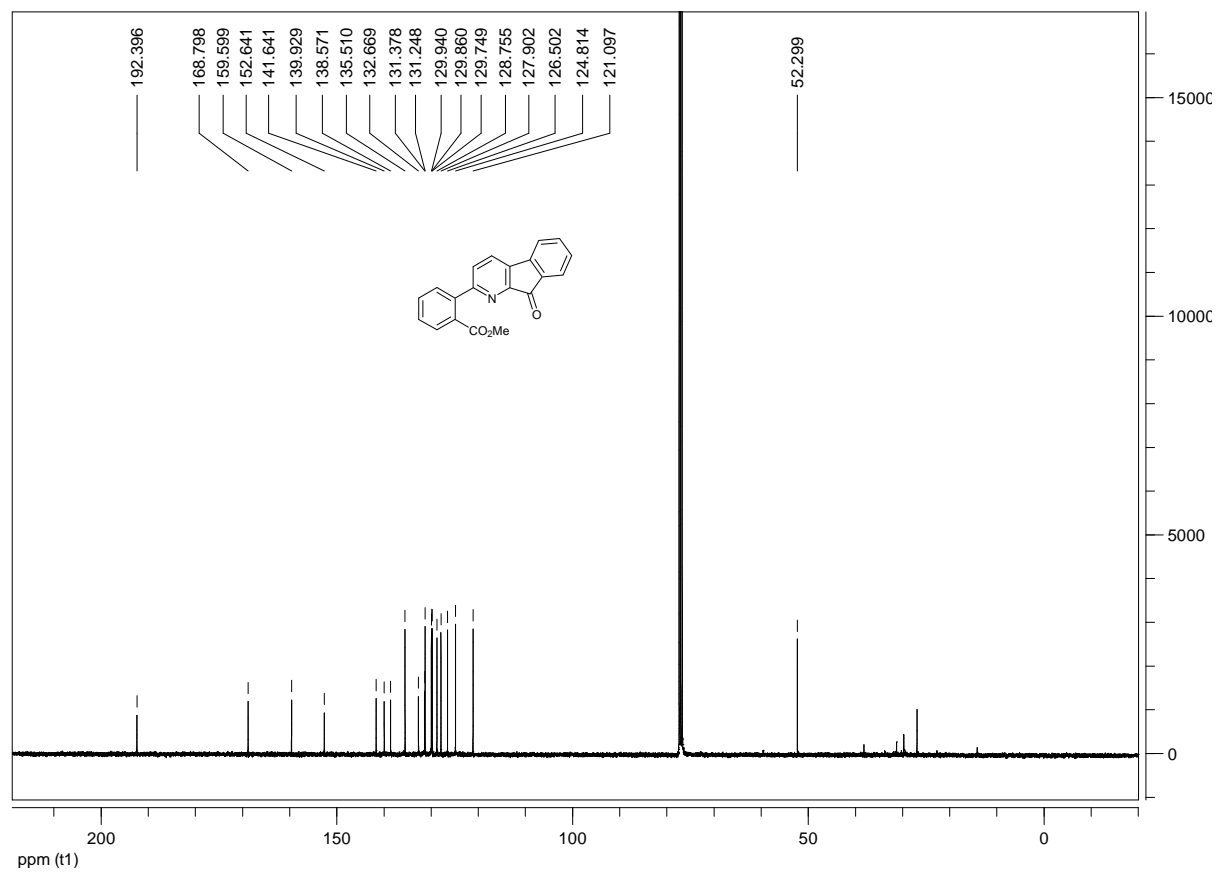



### 2-[4-(4-Methylsulfonyl-phenyl)-9-oxo-9H-indeno[2,1-b]pyridin-2-yl]-benzoic acid methyl ester (3c)

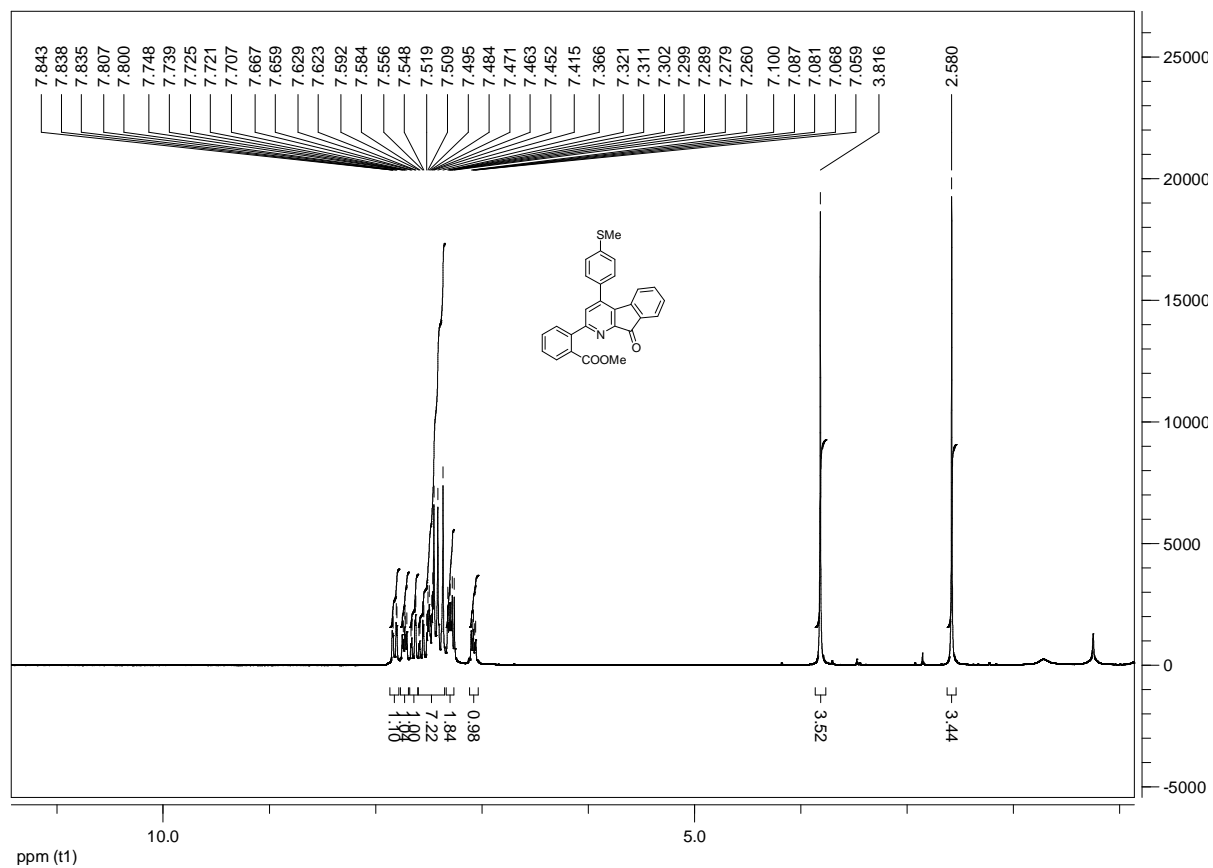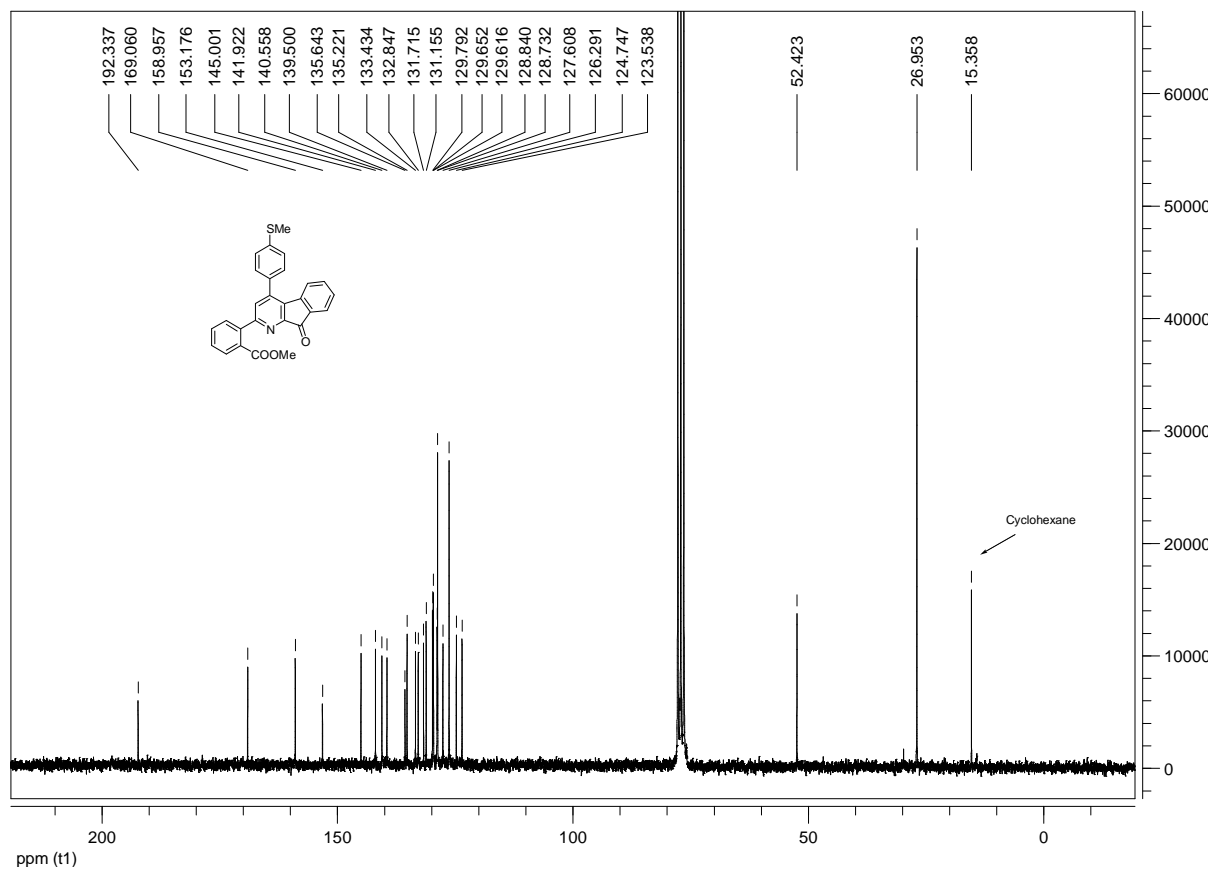

### 2-[4-(4-Formyl-phenyl)-9-oxo-9H-indeno[2,1-b]pyridin-2-yl]-benzoic acid methyl ester (3d)

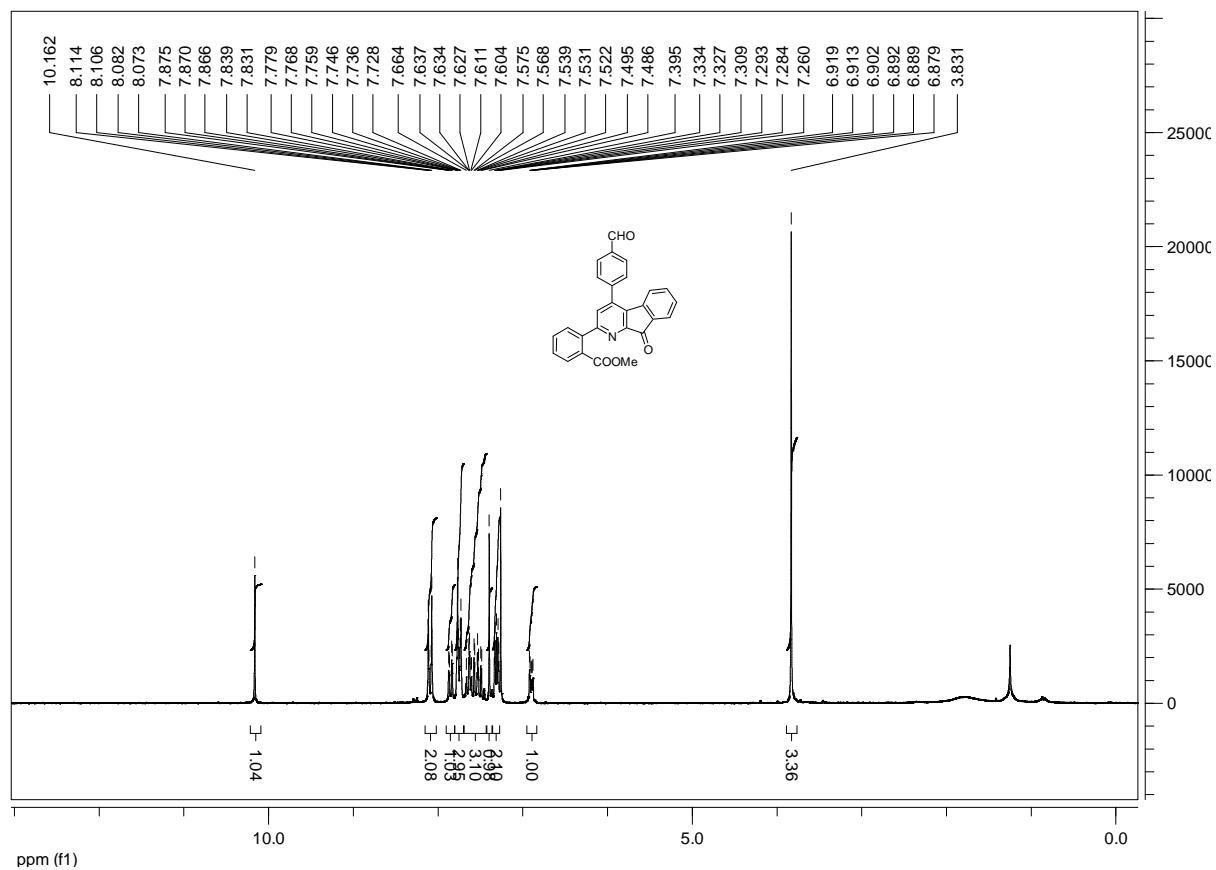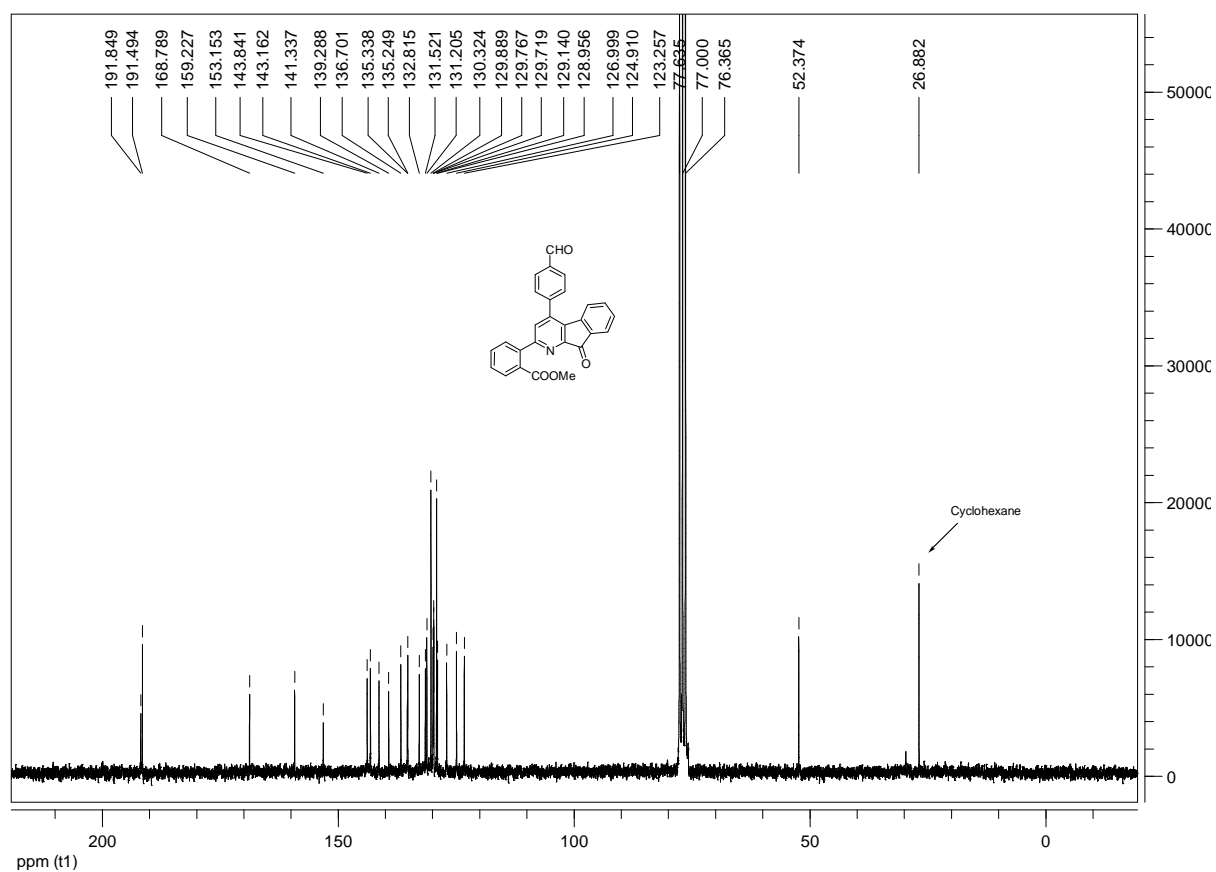

### 2-(7-Methoxy-9-oxo-9H-indeno[2,1-b]pyridin-2-yl)-benzoic acid methyl ester (3e)

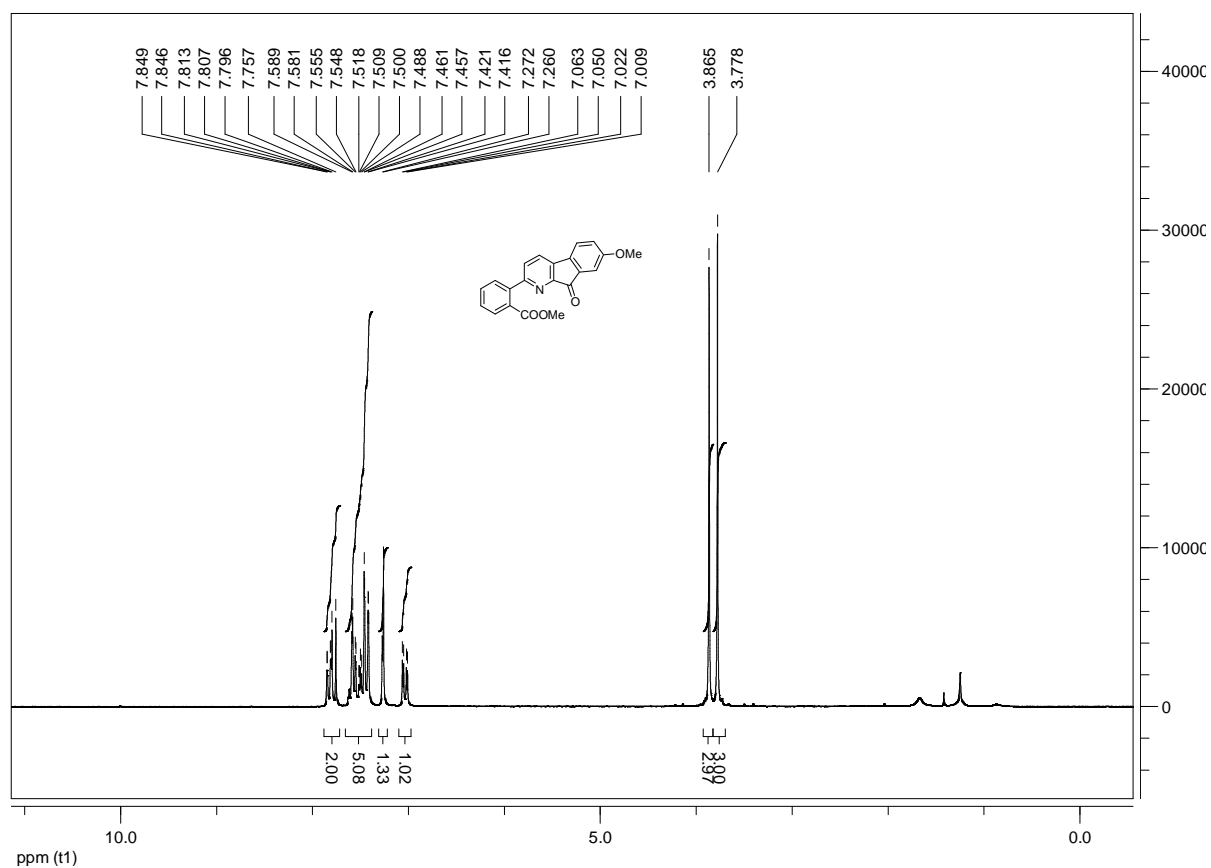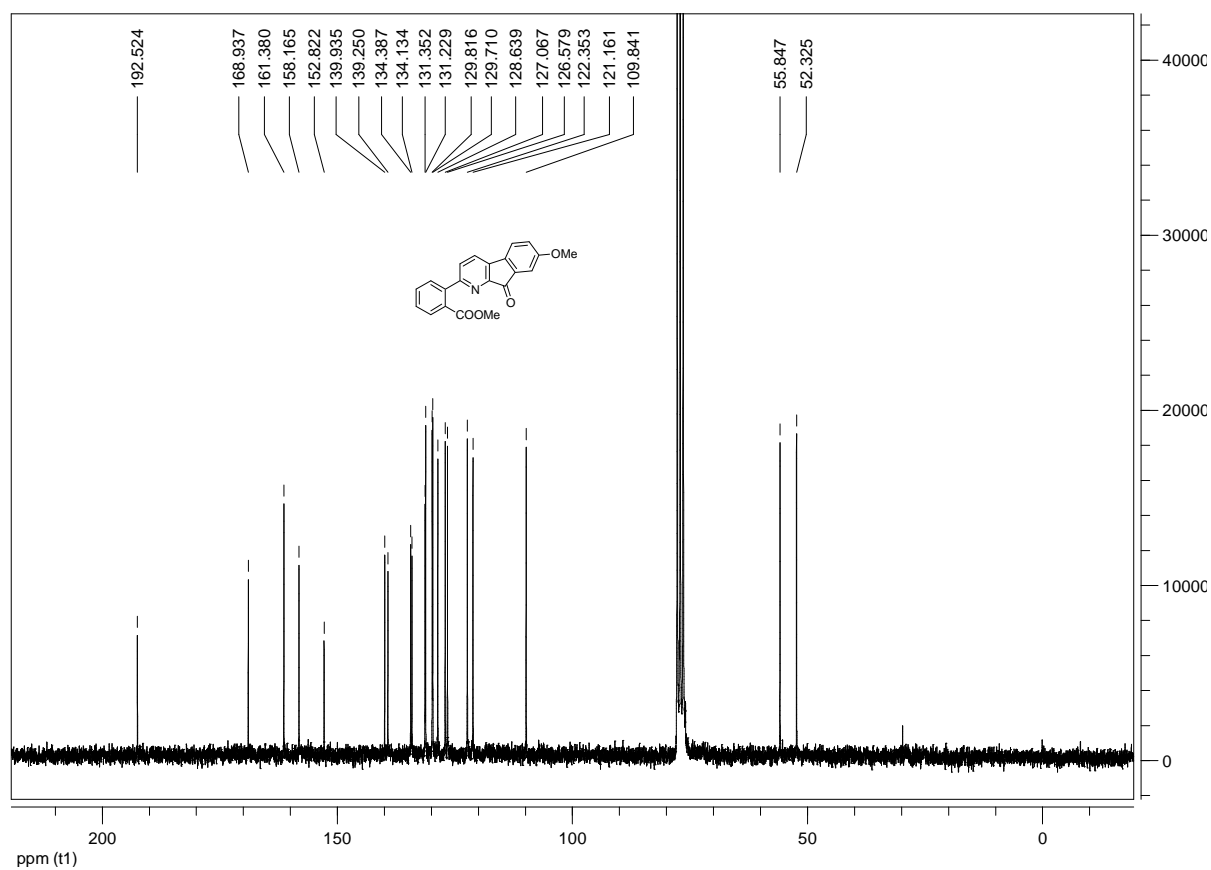







### 2-(7-Dimethylamino-9-oxo-9H-indeno[2,1-b]pyridin-2-yl)-benzoic acid methyl ester (3h)

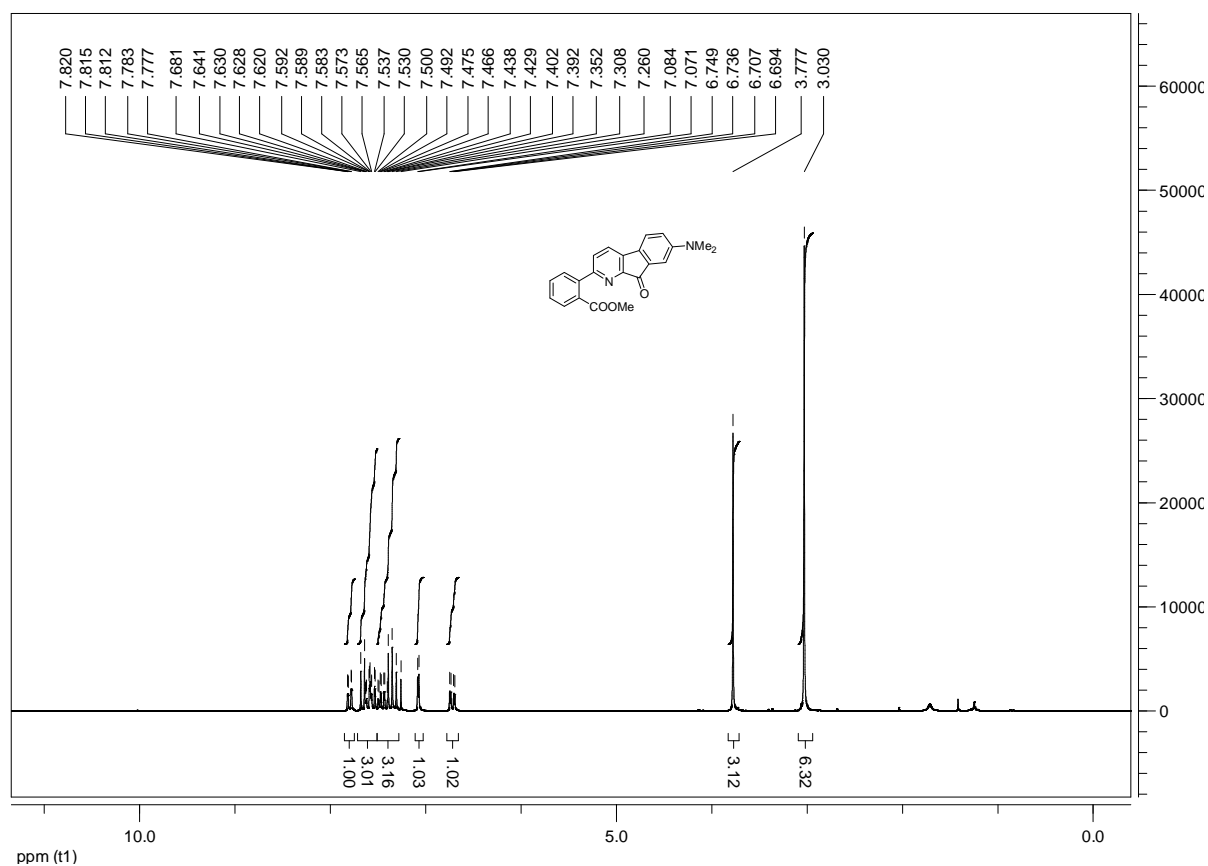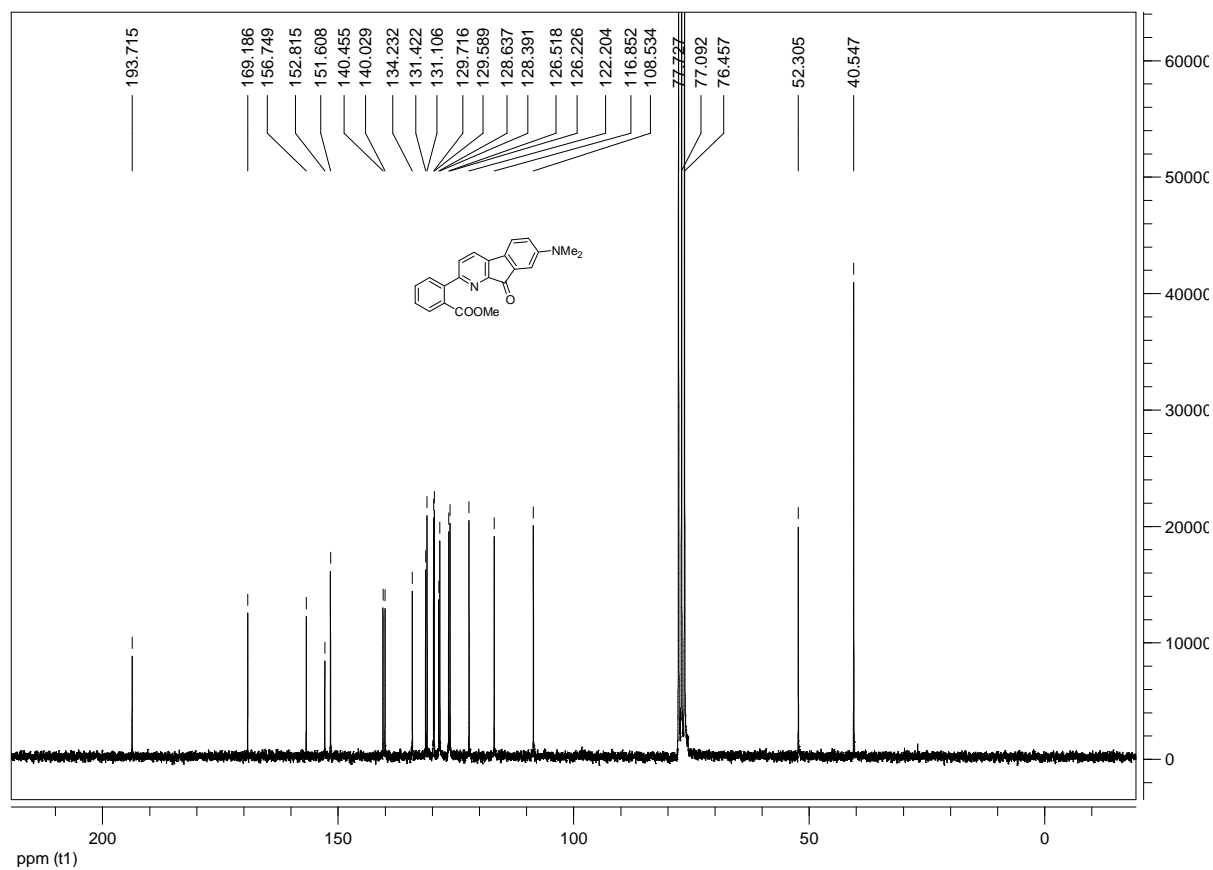

### 2-(7-Methylamino-9-oxo-9H-indeno[2,1-b]pyridin-2-yl)-benzoic acid methyl ester (4a)

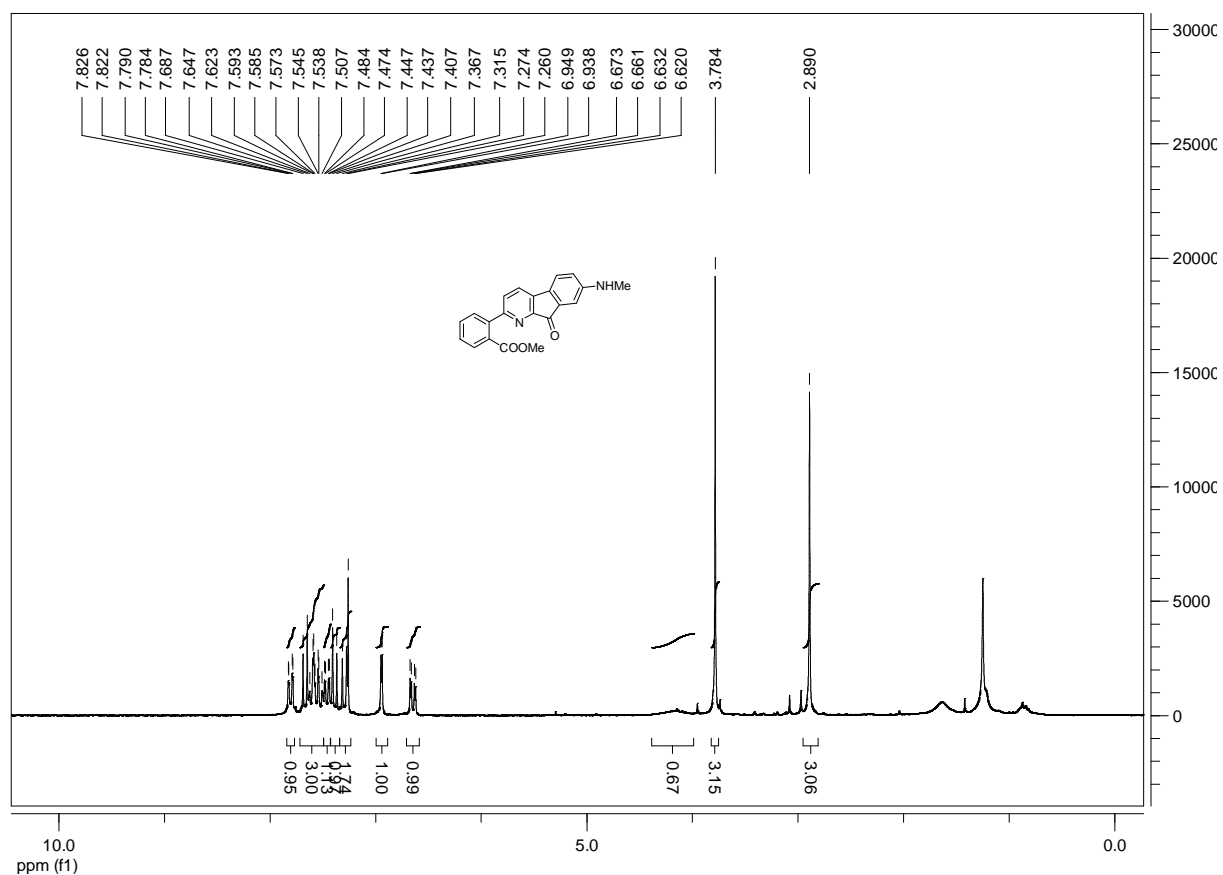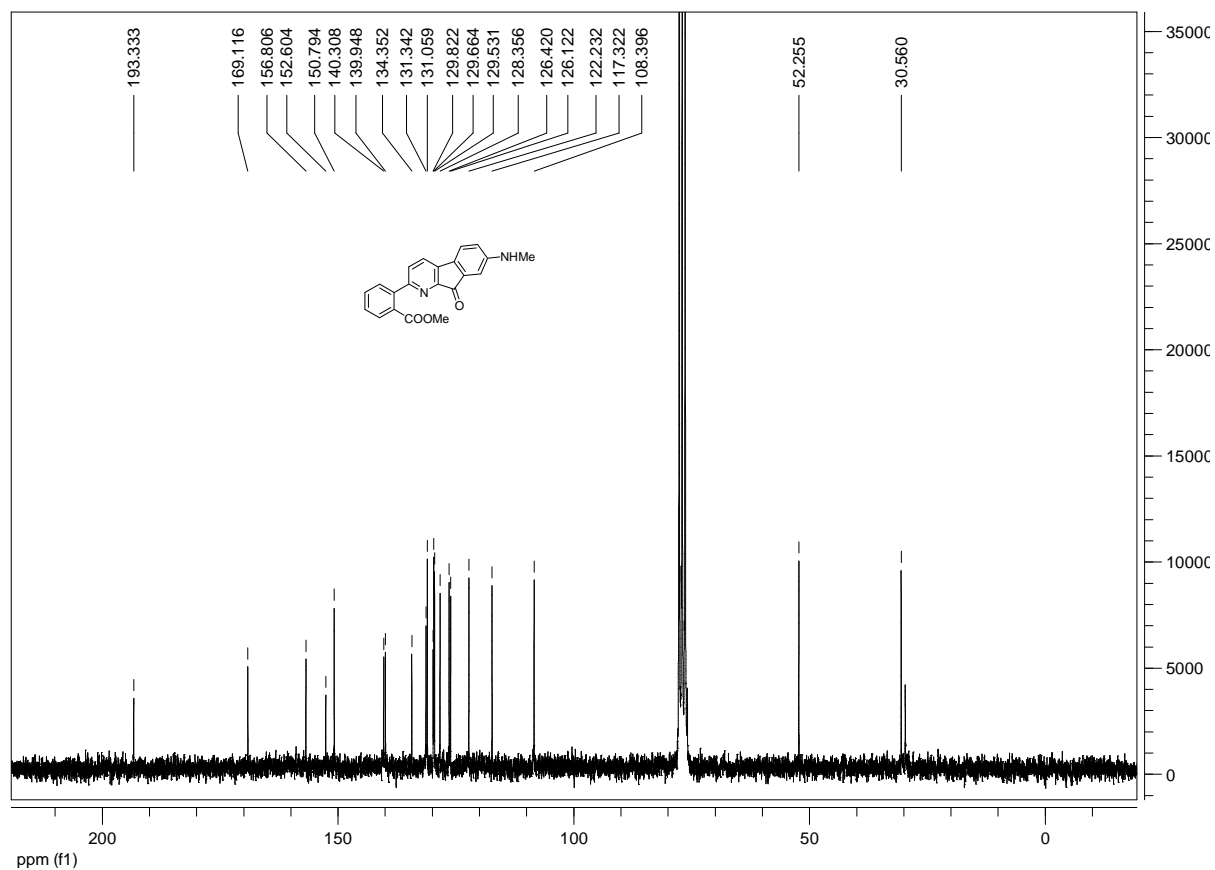

### 2-(7-Dimethylamino-9-oxo-9H-indeno[2,1-b]pyridin-2-yl)-5-methoxy-benzoic acid methyl ester (3i)

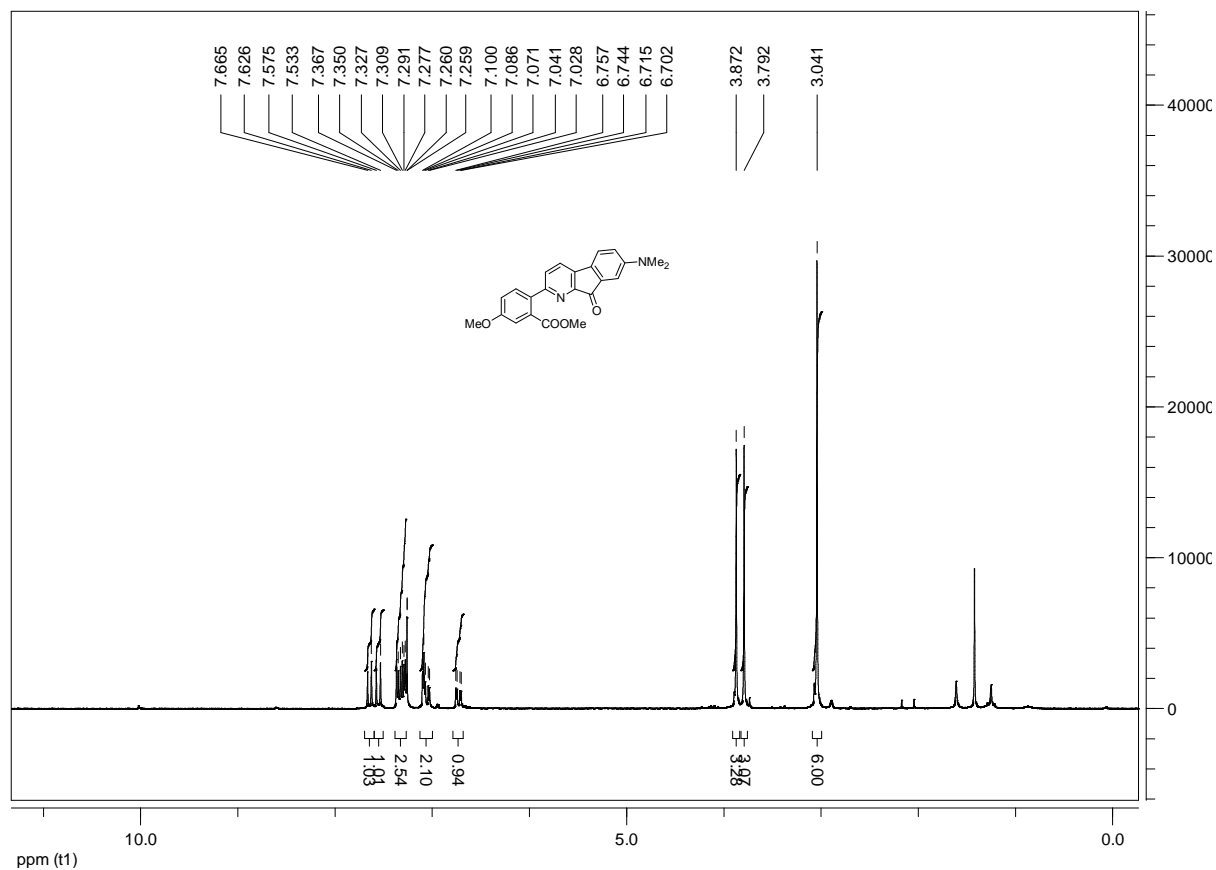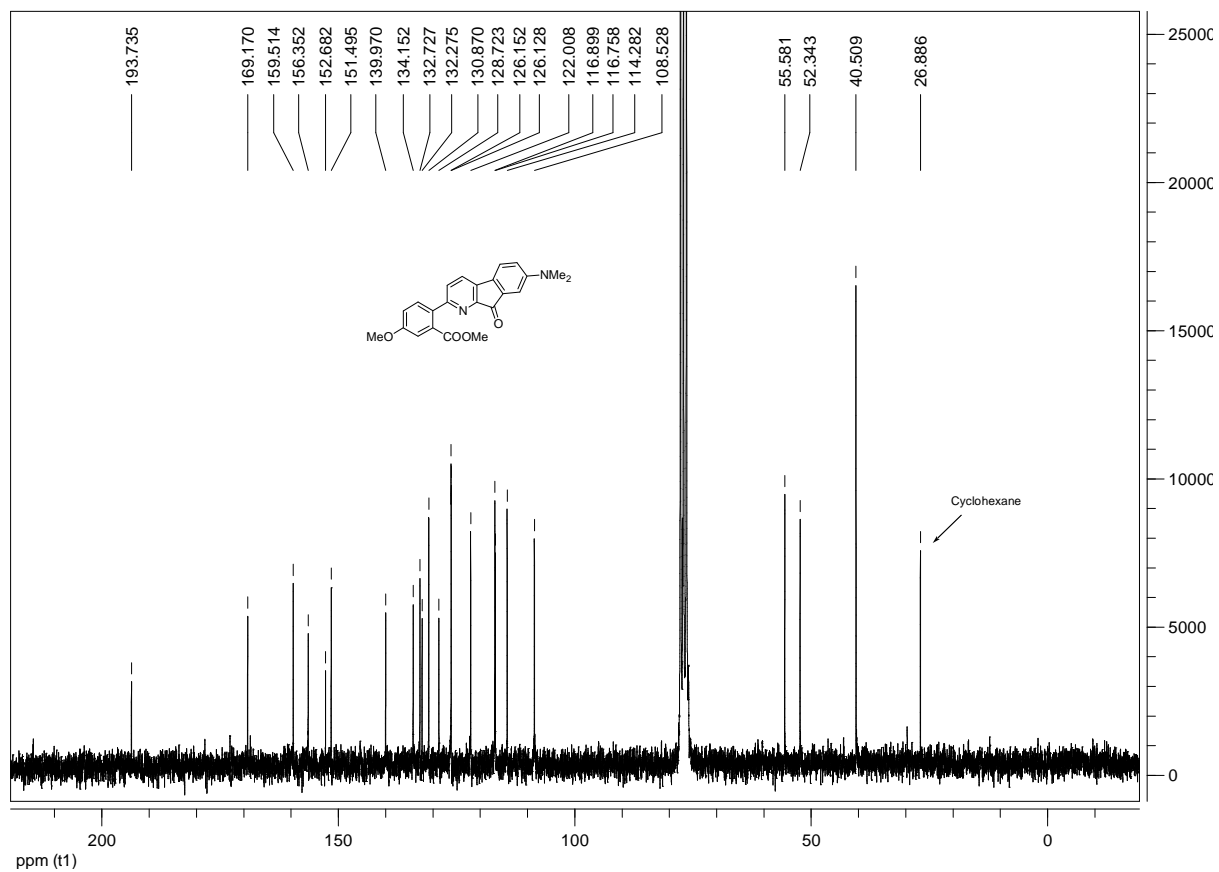

### 5-Methoxy-2-(7-methylamino-9-oxo-9H-indeno[2,1-b]pyridin-2-yl)-benzoic acid methyl ester (4b)

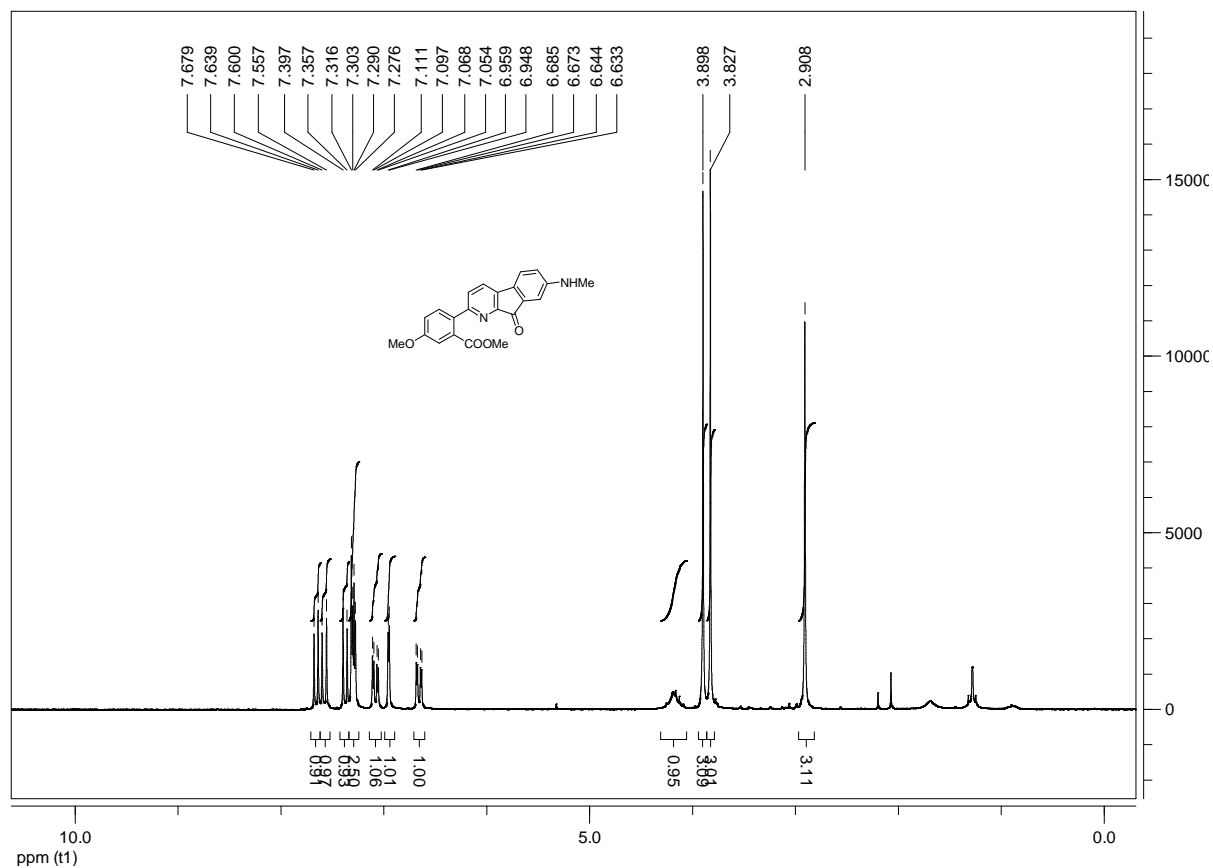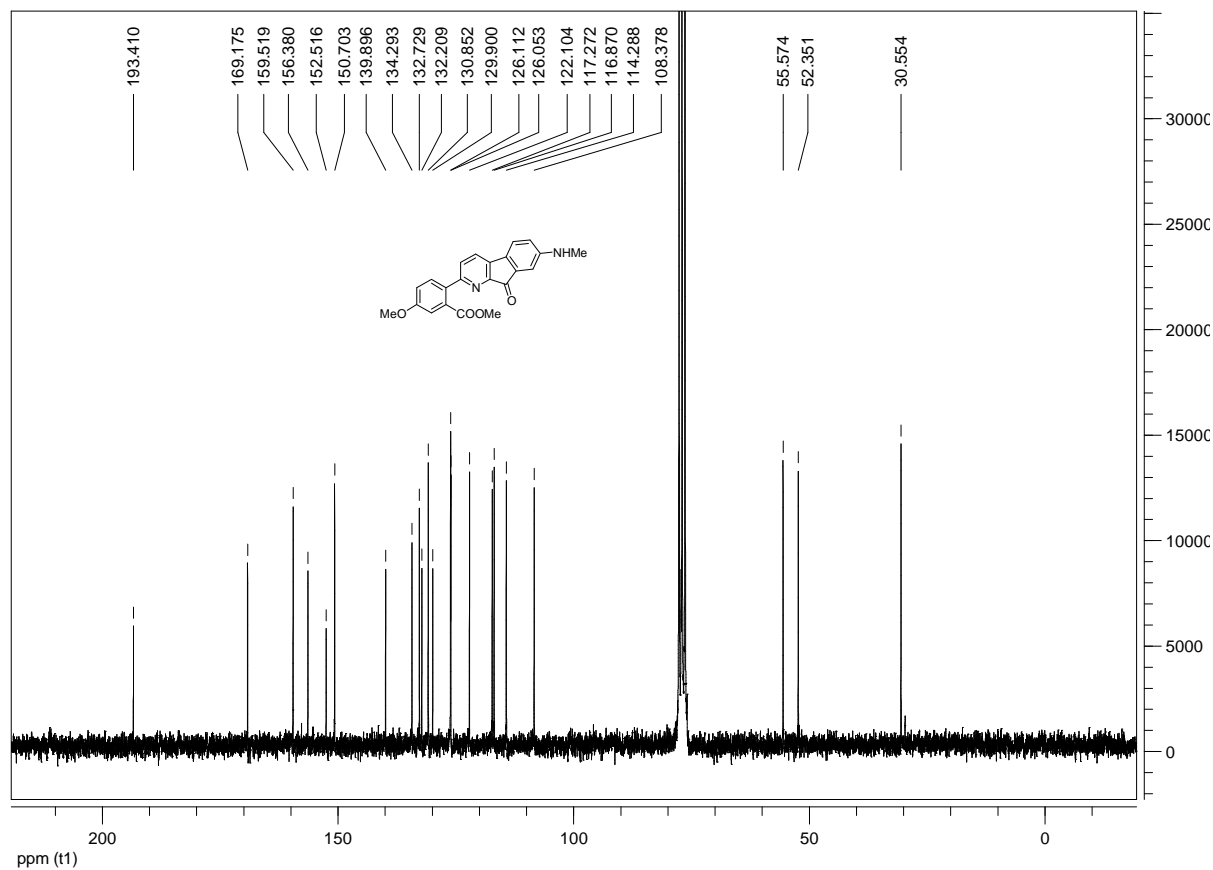

### 2-(9-Oxo-9H-indeno[2,1-b]pyridin-2-yl)-benzoic acid ethyl ester (5)

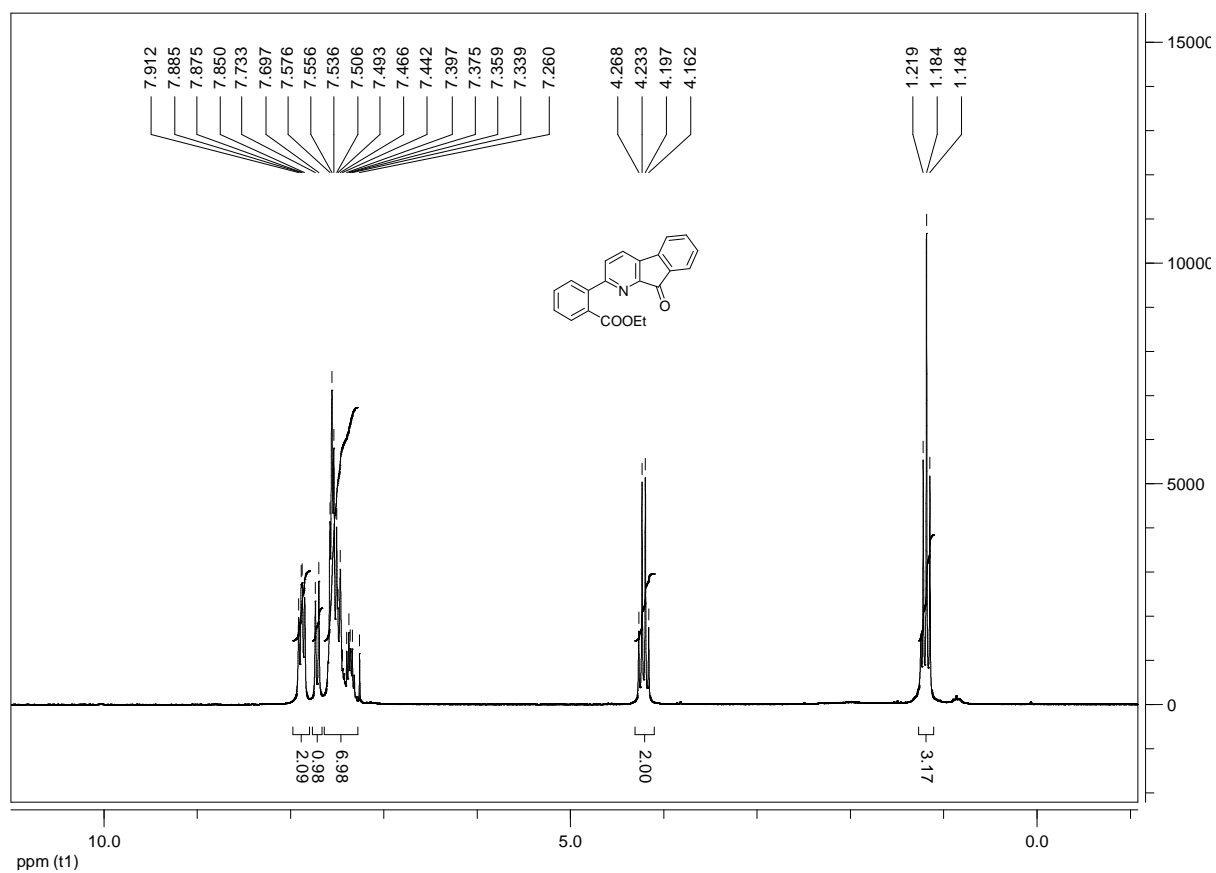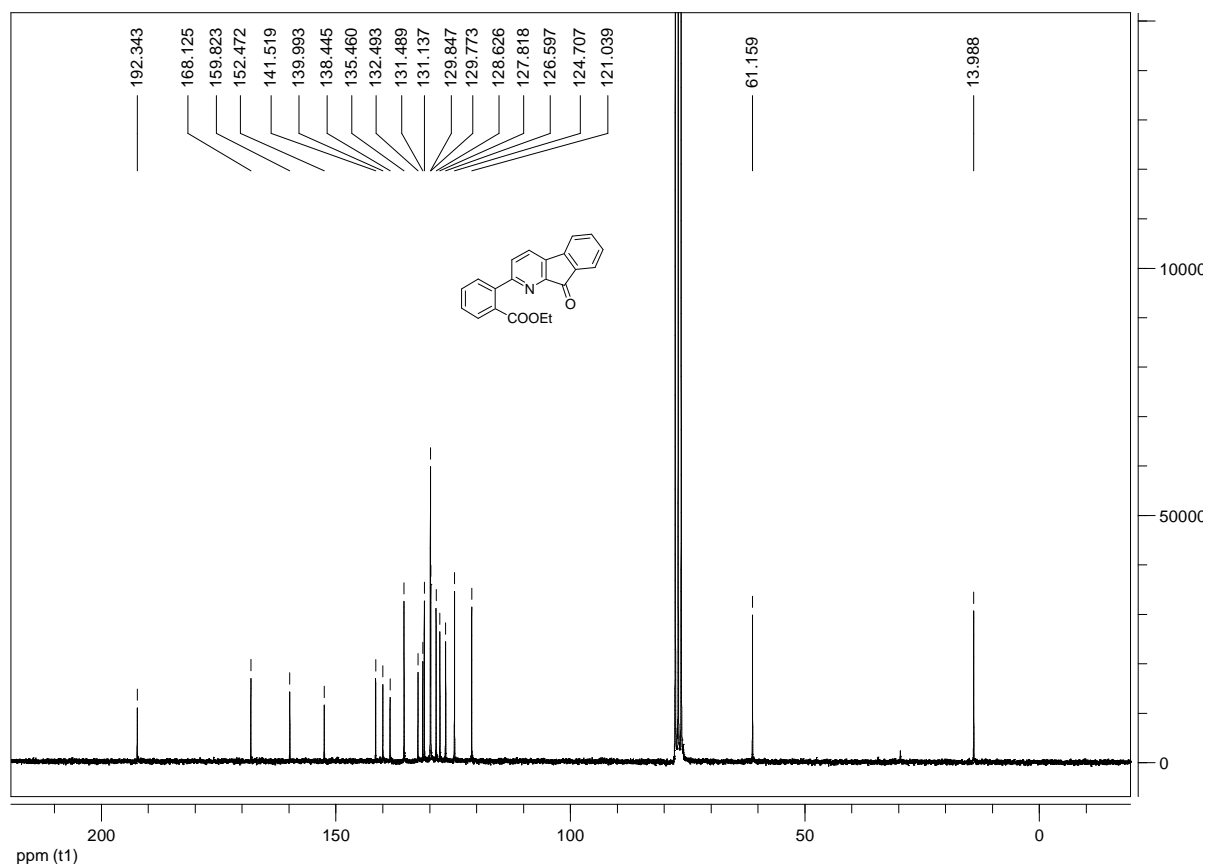

### 2-(9-Oxo-9H-indeno[2,1-b]pyridin-2-yl)-benzoic acid benzyl ester (6)

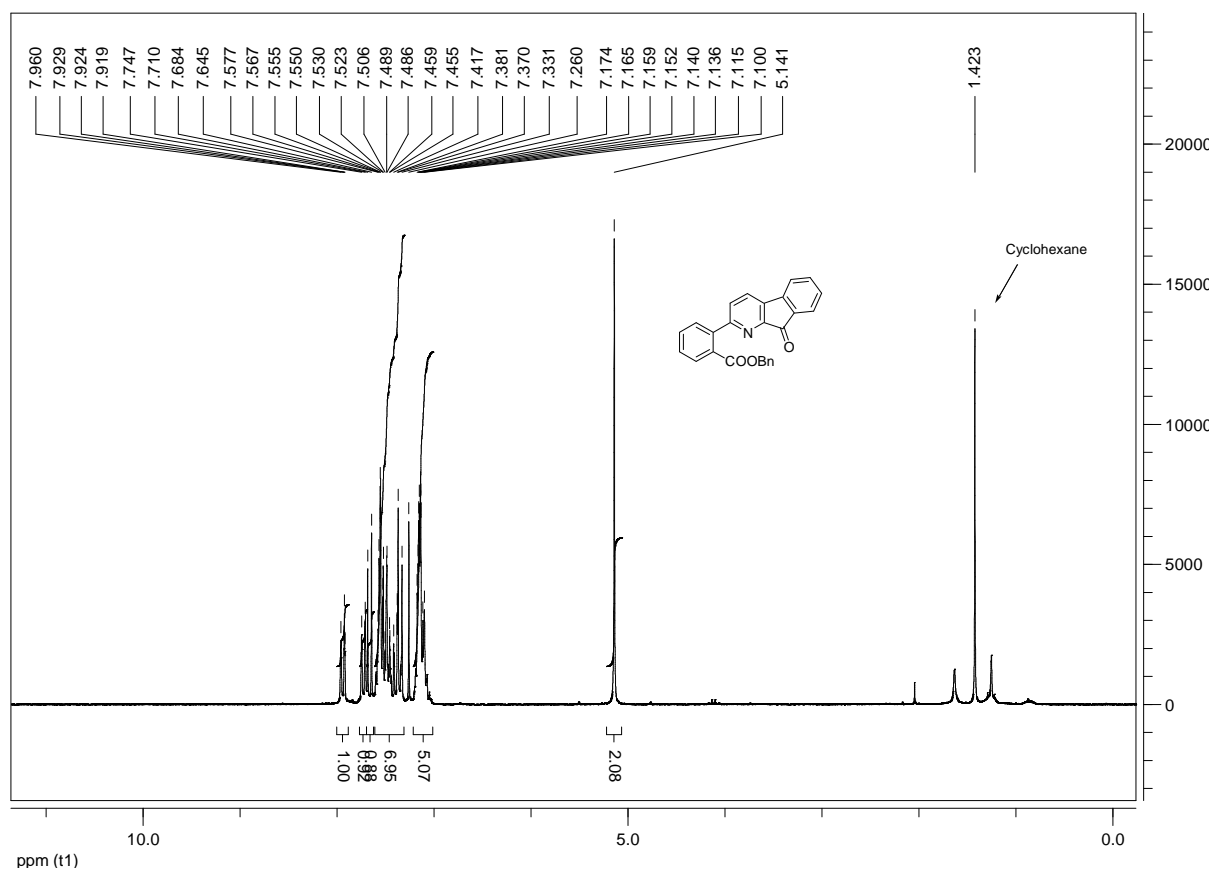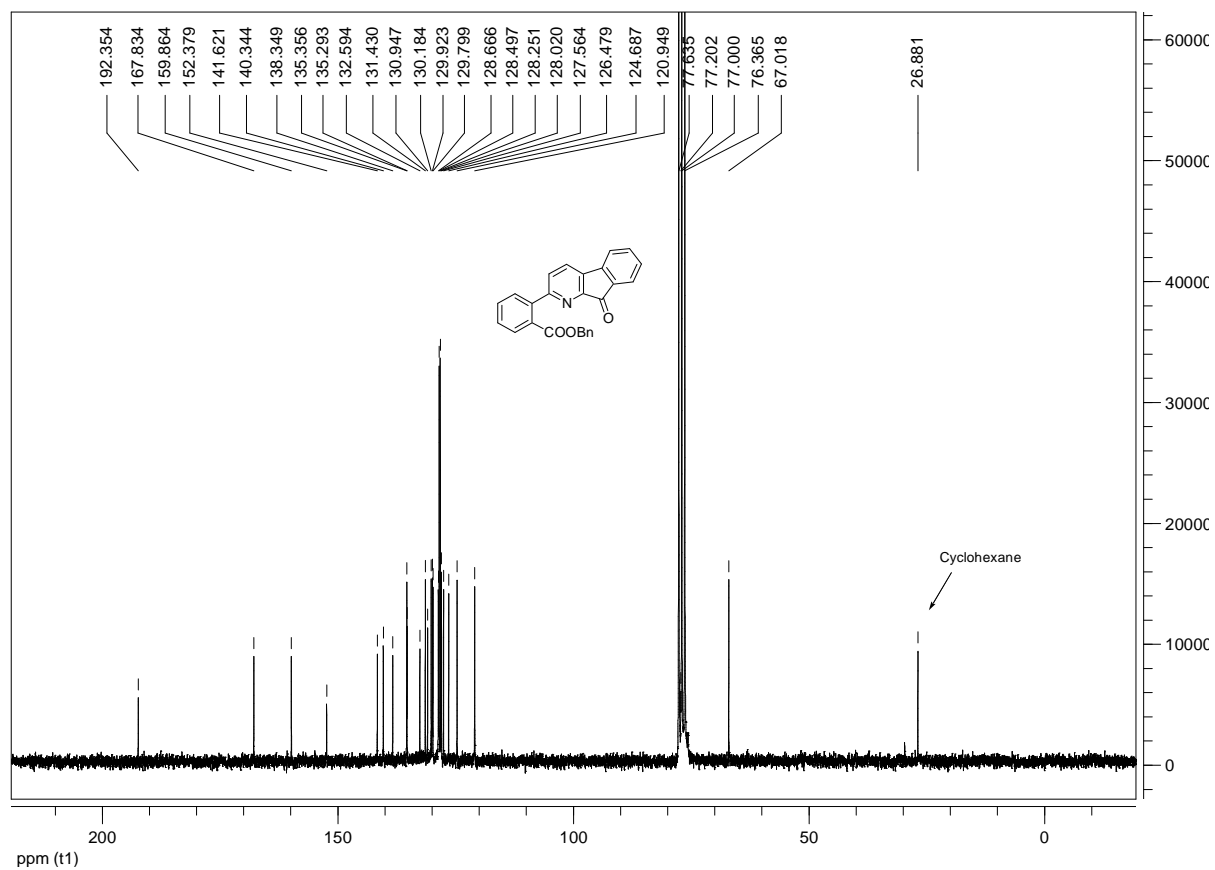

**2-(9-Oxo-9H-indeno[2,1-b]pyridin-2-yl)-benzoic acid 2-(3-hydroxy-propoxy)-ethyl ester  
(7)**

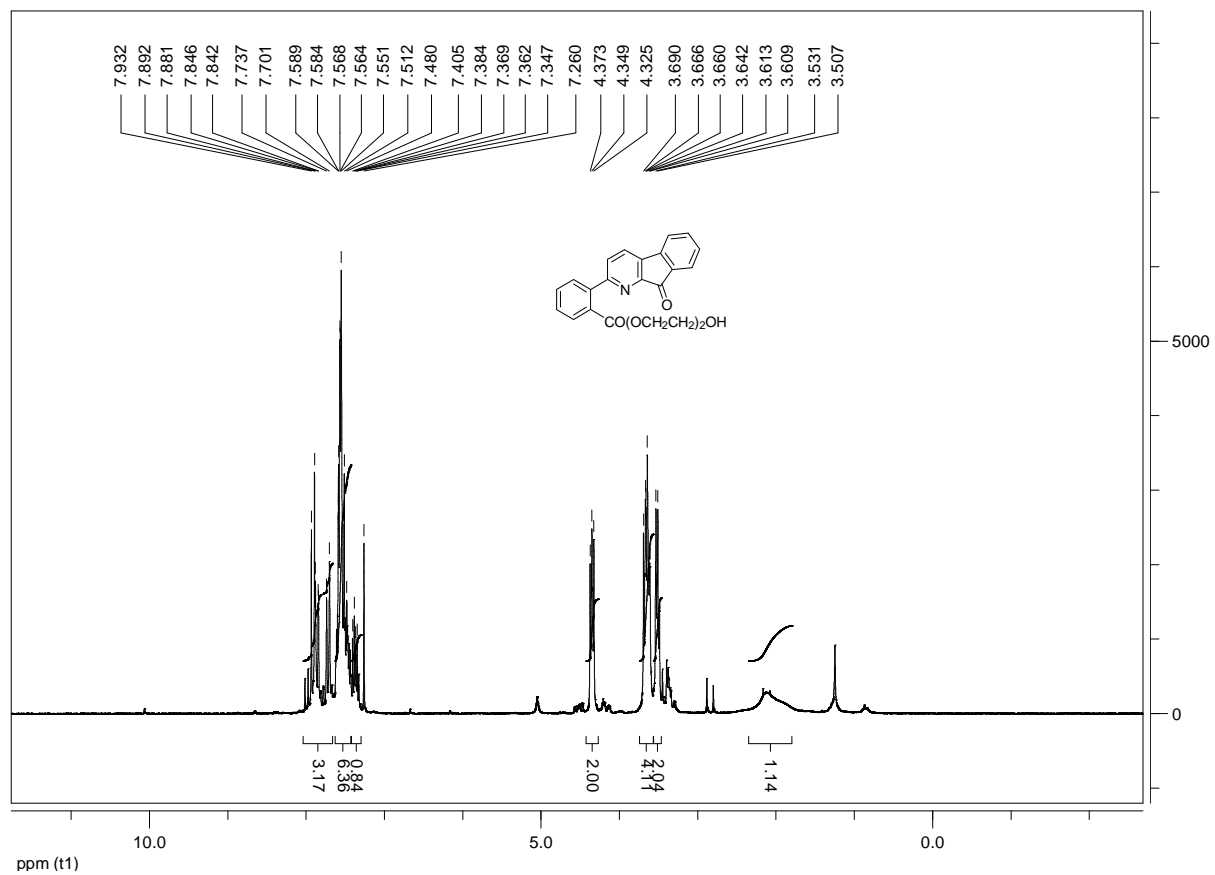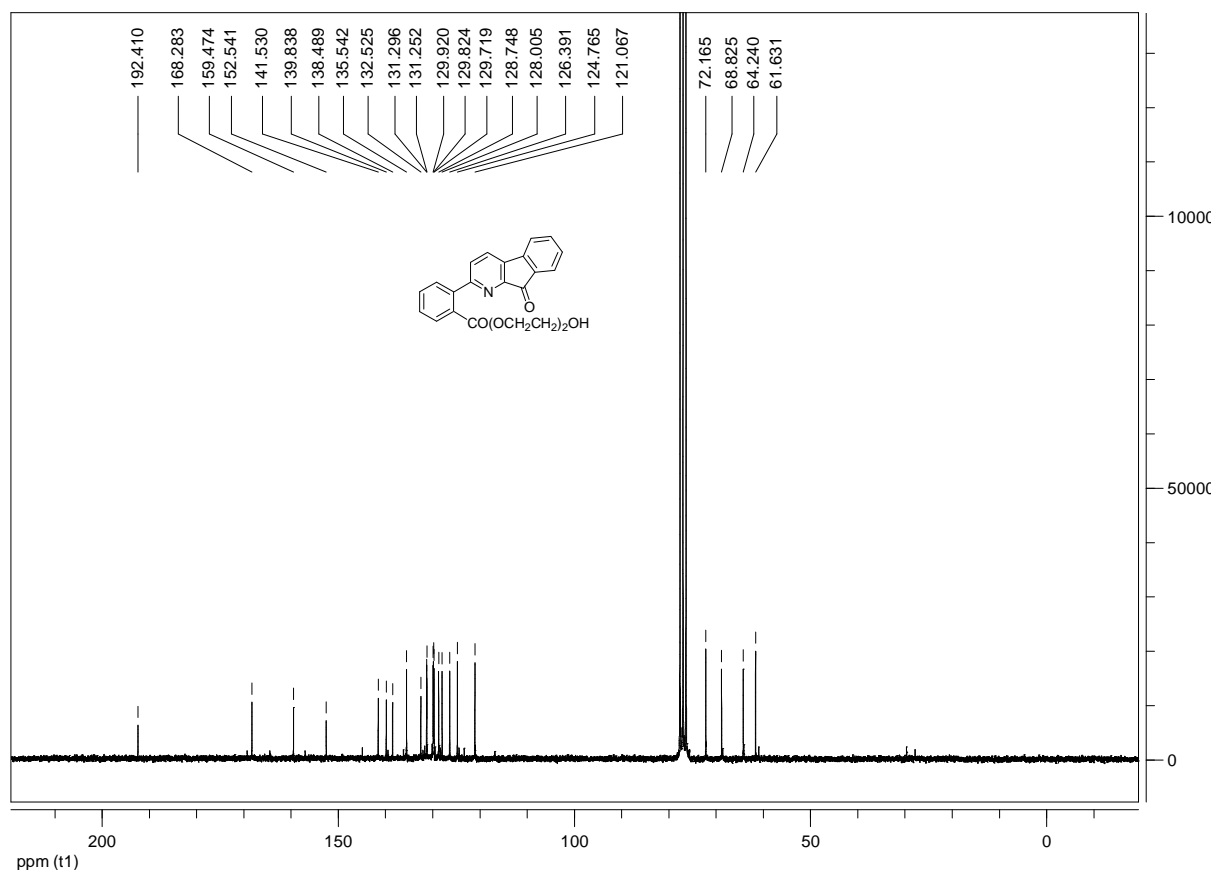

Supplement: c3ra43278e.pdf [file c3ra43278e.pdf]
